# Supplementary material for: Robust Beam Selection Based on Water Equivalent Thickness Analysis in Passive Scattering Carbon-Ion Radiotherapy for Pancreatic Cancer
Source: MDPI journal article supplement (doi:10.3390/cancers15092520), 2023-04-28
Supplement: s1 [file s1]

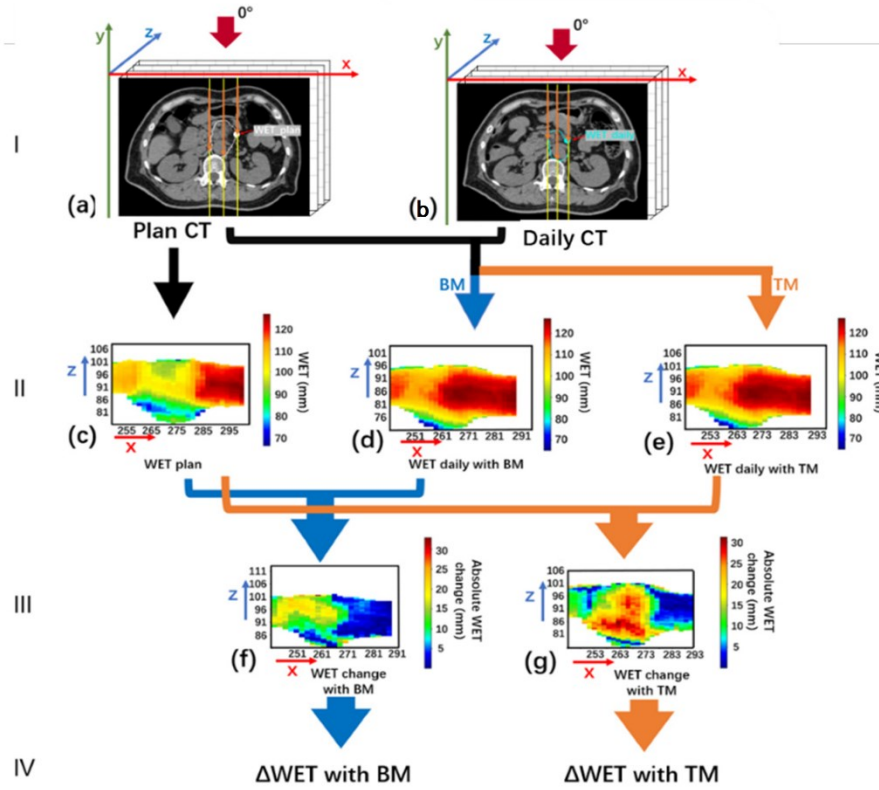

**Figure S1.** An example of the workflow of the WET changes at  $0^\circ$ . (a) and (b): The CT (plan and daily) images and reference coordinate axes. (c), (d), and (e): 2D matrix of WET<sub>plan</sub>, WET<sub>daily</sub> with BM, and TM in the  $0^\circ$  heat map, respectively. The coordinate systems for (d) and (e) were adjusted using BM and TM based on the (c). (f) and (g): 2D matrix of the absolute WET change heat map of the overlapping region with BM and TM in  $0^\circ$  beam pass, respectively.  $\Delta$ WET is the average value of the absolute WET change; red arrows: beam direction. Orange arrows: WET calculation range, yellow line: identified paths. The cross-section of each identified path is equal to the voxel of CT ( $1.07 \text{ mm} \times 1.07 \text{ mm}$ ).

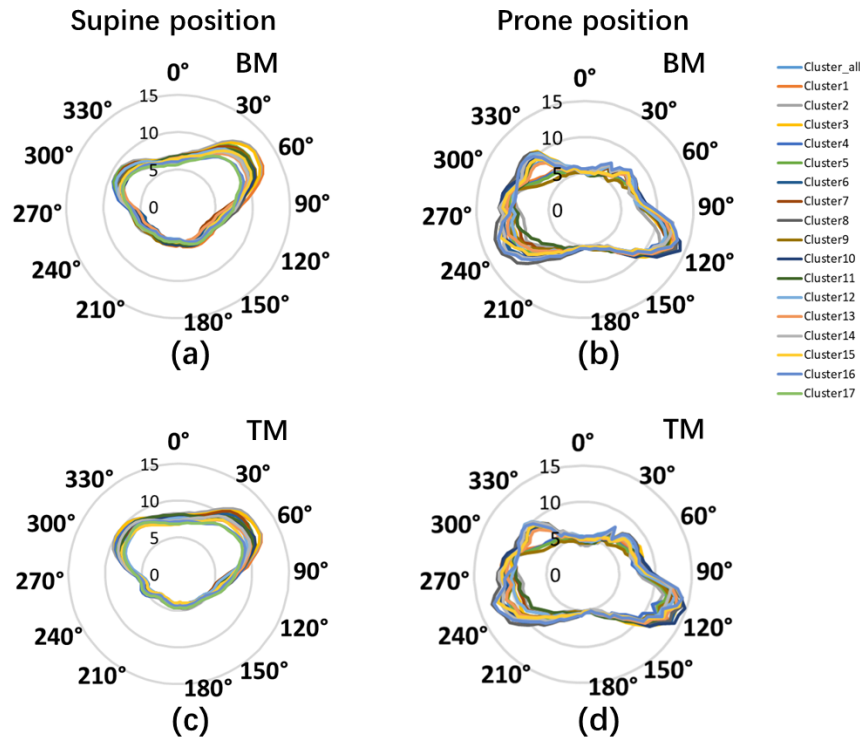

**Figure S2.** The polar plots show the mean  $\Delta WET$  for 18 patient clusters, with bone matching (BM) (a-b) and tumor matching (TM) (c-d) shown separately. Each line in the polar plots represents a different cluster of patients, with a total of 18 clusters used including 17 clusters with 6 patients and one cluster (cluster\_all) with 8 patients. For the cluster including patient 5, the mean values in prone position were calculated using data from the remaining five patients due to the unavailability of CT data for patient 5 in the prone position.

**Table S1.** Beam arrangement with three BCs for each fraction

**Table S1.1** Beam arrangement in the first nine fractions (for CTV1)

| Patient number | position | Beam configuration              | The first nine fractions |                 |                 |                 |                 |                 |                 |                 |                 |
|----------------|----------|---------------------------------|--------------------------|-----------------|-----------------|-----------------|-----------------|-----------------|-----------------|-----------------|-----------------|
|                |          |                                 | 1 <sup>st</sup>          | 2 <sup>nd</sup> | 3 <sup>rd</sup> | 4 <sup>th</sup> | 5 <sup>th</sup> | 6 <sup>th</sup> | 7 <sup>th</sup> | 8 <sup>th</sup> | 9 <sup>th</sup> |
| 1-8            | Supine   | BC_original (0° ,90° and 270°)  | 0°                       | 90°             | 270°            | 0°              | 90°             | 270°            | 0°              | 90°             | 270°            |
|                |          | BC_fixed (355° ,110° and 255°)  | 355°                     | 110°            | 255°            | 355°            | 110°            | 255°            | 355°            | 110°            | 255°            |
|                |          | BC_gantry (345° ,150° and 210°) | 345°                     | 150°            | 210°            | 345°            | 150°            | 210°            | 345°            | 150°            | 210°            |

**Table S1.2** Beam arrangement in the last three fractions (for CTV2)

| Patient number | position | Beam configuration | The three last fractions |                  |                  |
|----------------|----------|--------------------|--------------------------|------------------|------------------|
|                |          |                    | 10 <sup>th</sup>         | 11 <sup>th</sup> | 12 <sup>th</sup> |
| 1-4,6-8        | Prone    | BC_original (180°) | 180°                     | 180°             | 180°             |

|   |        |                  |      |      |      |
|---|--------|------------------|------|------|------|
|   |        | BC_fixed (180°)  | 180° | 180° | 180° |
|   |        | BC_gantry (0°)   | 0°   | 0°   | 0°   |
| 5 | Supine | BC_original (0°) | 0°   | 0°   | 0°   |
|   |        | BC_fixed (0°)    | 0°   | 0°   | 0°   |
|   |        | BC_gantry (0°)   | 0°   | 0°   | 0°   |
|   |        |                  |      |      |      |

**Table S2.** Three beam schedules for the BC\_gantry

| Beam schedule |                 |      |      |      |      |      |      |      |      |                |      |      |
|---------------|-----------------|------|------|------|------|------|------|------|------|----------------|------|------|
| day           | Supine position |      |      |      |      |      |      |      |      | Prone position |      |      |
|               | 1st             | 2nd  | 3rd  | 4th  | 5th  | 6th  | 7th  | 8th  | 9th  | 10th           | 11th | 12th |
| Order 1*      | 345°            | 150° | 210° | 345° | 150° | 210° | 345° | 150° | 210° | 0°             | 0°   | 0°   |
| Order 2       | 150°            | 150° | 150° | 210° | 210° | 210° | 345° | 345° | 345° | 0°             | 0°   | 0°   |
| Order 3       | 345°            | 345° | 345° | 150° | 150° | 150° | 210° | 210° | 210° | 0°             | 0°   | 0°   |

\* Shown in the main text

**Table S3.** V95% of CTV1 and CTV2 with the BC\_gantry in three schedules

|        |      | Accumulated dose |         |         |         |         |         |
|--------|------|------------------|---------|---------|---------|---------|---------|
|        |      | TM               |         |         | BM      |         |         |
|        |      | Order 1          | Order 2 | Order 3 | Order 1 | Order 2 | Order 3 |
| Case 1 | CTV1 | 72.9%            | 81.2%   | 68.1%   | 79.3%   | 78.0%   | 68.0%   |
|        | CTV2 | 77.5%            | 82.8%   | 75.2%   | 76.5%   | 75.7%   | 69.6%   |
| Case 2 | CTV1 | 98.1%            | 97.0%   | 99.2%   | 95.7%   | 95.4%   | 96.4%   |
|        | CTV2 | 96.3%            | 96.2%   | 99.4%   | 95.7%   | 96.1%   | 96.5%   |
| Case 3 | CTV1 | 88.3%            | 85.1%   | 92.6%   | 88.4%   | 86.4%   | 90.1%   |
|        | CTV2 | 92.6%            | 89.2%   | 91.4%   | 89.1%   | 87.2%   | 89.4%   |
| Case 4 | CTV1 | 94.2%            | 94.8%   | 93.7%   | 94.7%   | 94.6%   | 93.7%   |
|        | CTV2 | 93.7%            | 93.2%   | 93.4%   | 93.2%   | 93.7%   | 92.6%   |
| Case 5 | CTV1 | 90.3%            | 87.9%   | 90.6%   | 76.9%   | 73.5%   | 76.4%   |
|        | CTV2 | 91.8%            | 87.5%   | 90.7%   | 49.8%   | 48.0%   | 48.5%   |
| Case 6 | CTV1 | 94.4%            | 92.8%   | 92.2%   | 91.5%   | 92.2%   | 91.0%   |
|        | CTV2 | 96.2%            | 93.6%   | 97.1%   | 94.0%   | 94.7%   | 94.3%   |
| Case 7 | CTV1 | 93.1%            | 91.3%   | 91.1%   | 86.4%   | 85.9%   | 85.5%   |
|        | CTV2 | 94.4%            | 91.4%   | 93.3%   | 91.8%   | 92.1%   | 90.5%   |
| Case 8 | CTV1 | 98.6%            | 99.3%   | 98.5%   | 99.1%   | 99.2%   | 98.7%   |
|        | CTV2 | 99.8%            | 100.0%  | 100.0%  | 100.0%  | 99.8%   | 98.9%   |

CTV1 is based on the first nine fractions. CTV2 is based on all twelve fractions.
